# Supplementary material for: Cell-free DNA profiling informs all major complications of hematopoietic cell transplantation
Source: PubMed Central journal article supplement — Proc Natl Acad Sci U S A. 2022 Jan 20;119(4):e2113476118. doi: 10.1073/pnas.2113476118 (PMC8795552; doi:10.1073/pnas.2113476118), 2022-01-20
Supplement: pnas.2113476118.sapp.pdf [file pnas.2113476118.sapp.pdf]

**Supplemental Materials for:**

**Cell-free DNA Profiling Informs All Major Complications of Hematopoietic Cell Transplantation**

Alexandre Pellan Cheng<sup>1</sup>, Matthew Pellan Cheng<sup>2,3</sup>, Conor James Loy<sup>4</sup>, Joan Sesing Lenz<sup>1</sup>, Kaiwen Chen<sup>2,3</sup>, Sami Smalling<sup>1</sup>, Philip Burnham<sup>5</sup>, Kaitlyn Marie Timblin<sup>2,3</sup>, José Luis Orejas<sup>2,3</sup>, Emily Silverman<sup>2,3</sup>, Paz Polak<sup>6,7</sup>, Francisco M. Marty<sup>3,8</sup>, Jerome Ritz<sup>2,8</sup>, Iwijn De Vlaminck<sup>1,\*</sup>

<sup>1</sup>Meinig School of Biomedical Engineering, Cornell University, Ithaca, NY, USA

<sup>2</sup>Department of Medical Oncology, Dana-Farber Cancer Institute, Boston, MA, USA

<sup>3</sup>Division of Infectious Disease, Brigham and Women's Hospital, Boston, MA, USA

<sup>4</sup>Department of Molecular Biology and Genetics, Cornell University, Ithaca, NY, USA

<sup>5</sup>Department of Bioengineering, University of Pennsylvania, Philadelphia, PA, USA

<sup>6</sup>Department of Oncological Sciences, Icahn School of Medicine at Mount Sinai, NY, USA

<sup>7</sup>The Tisch Cancer Institute, Icahn School of Medicine at Mount Sinai, NY USA

<sup>8</sup>Department of Medicine, Harvard Medical School, Boston, MA, USA

\*Corresponding author ([vlaminck@cornell.edu](mailto:vlaminck@cornell.edu))

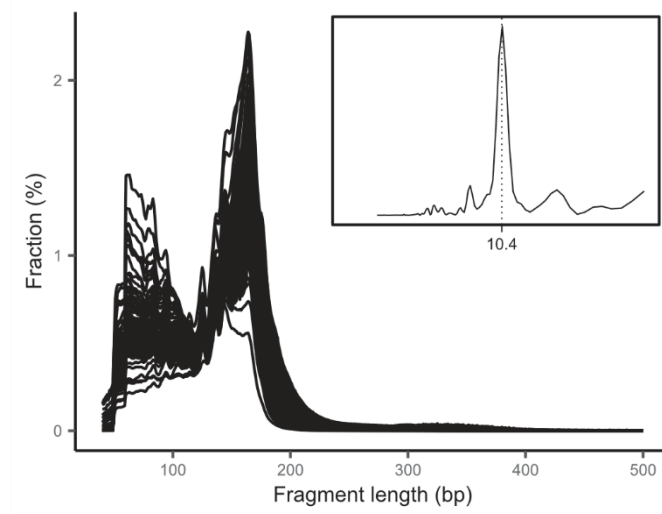

**Supplementary figure 1.** Fragment length profiles of 170 cfDNA samples after bisulfite treatment. Inset: Fourier analysis reveals a 10.4 bp periodicity in the fragment length profiles of bisulfite treated cfDNA.

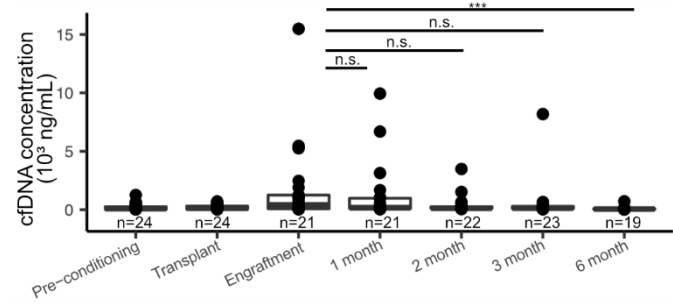

**Supplementary figure 2.** Total cfDNA concentration by timepoint.

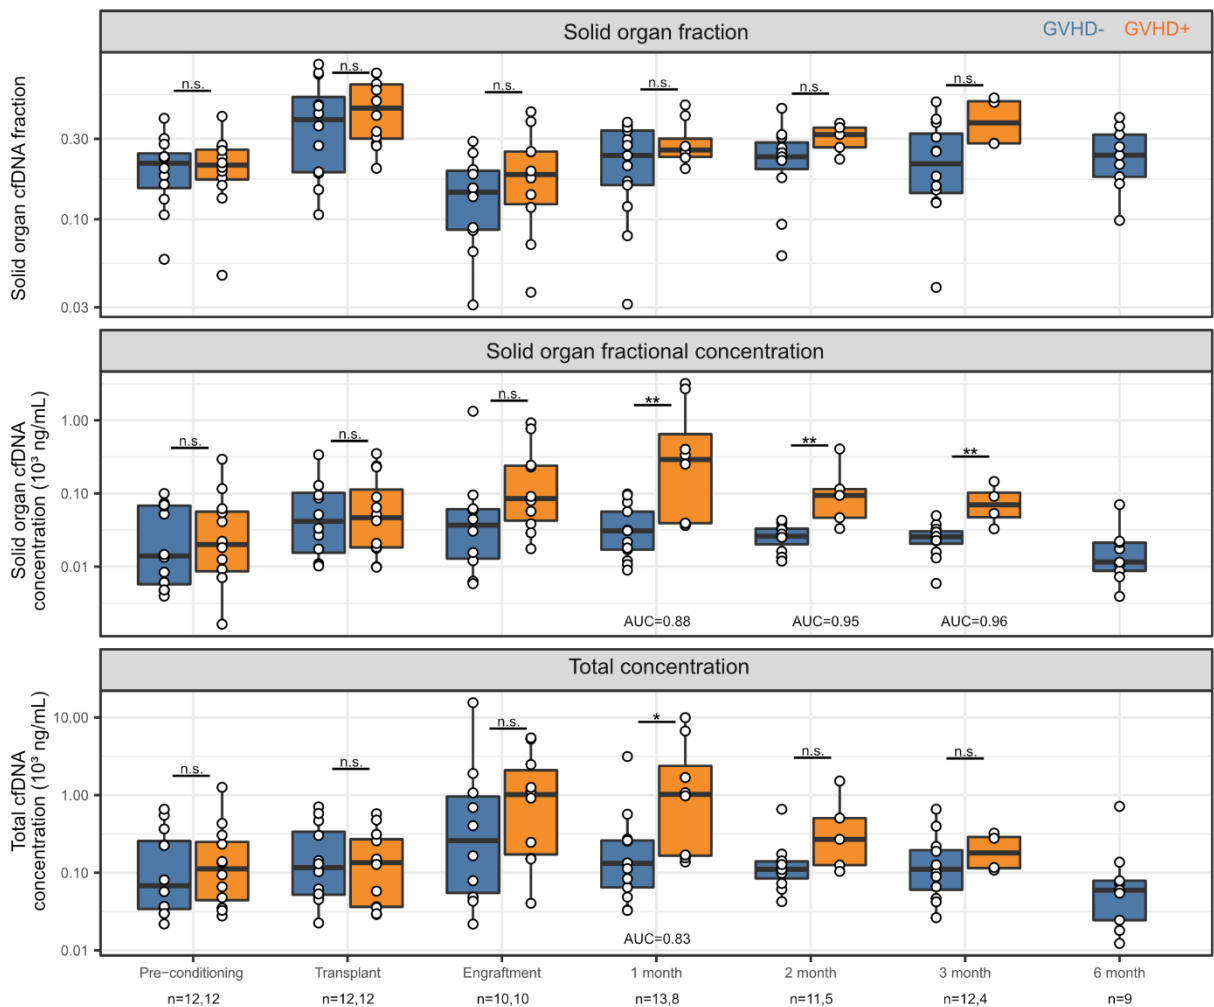

**Supplementary figure 3. Tissue of origin and cell-free DNA concentrations to identify graft-versus-host disease.** Top: Solid organ fraction. Middle: Solid organ fractional concentration. Bottom: Total concentration. Statistical tests for significance were performed with a two-sided Wilcoxon test. Receiving operating characteristic areas under the curve (AUCs) are shown for comparisons with a significant p-value. \*: p-value < 0.05; \*\*: p-value < 0.01.

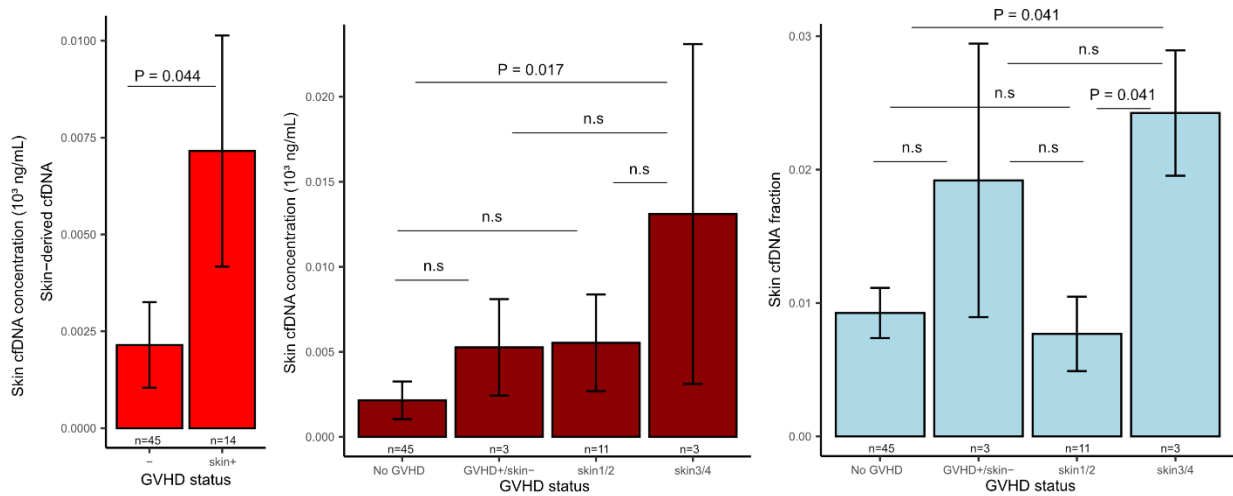

**Supplementary figure 4. Skin-derived cfDNA in patients with GVHD.** Left: skin cfDNA concentration by status (GVHD-, skin+). Middle: skin cfDNA concentration in 4 groups of patients (No GVHD, GVHD+/skin-, low-grade skin GVHD (grades 1 or 2), high grade skin GVHD (grades 3 or 4). Right: skin cfDNA proportion in 4 patient groups. Error bars represent standard error of the mean.

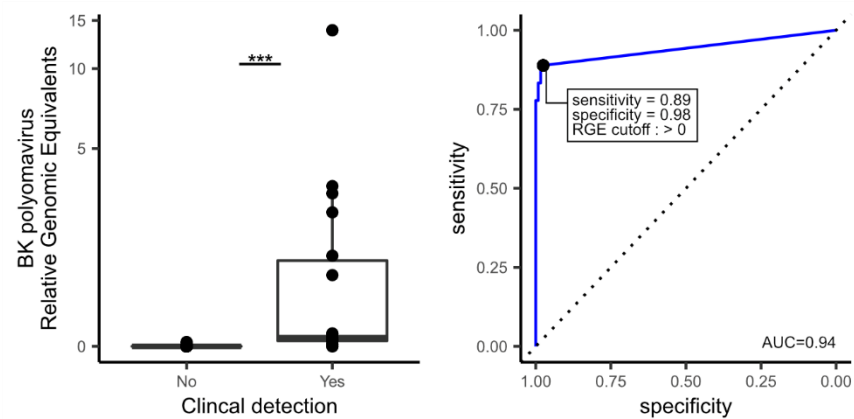

**Supplementary figure 5. Comparative analysis between clinical detection and cell-free DNA detection of BK polyomavirus.** Left: Boxplot comparison between the BK polyomavirus relative genomic abundance (RGE) in samples with clinical detection of BK in the blood and in samples without. Right: receiving operating characteristic curve analyzing the ability of BK RGE to identify BK polyomavirus in the blood. Note: at a cutoff of RGE > 0, there are 3 false positives and 2 false negatives identified. \*\*\*: p-value < 0.001.

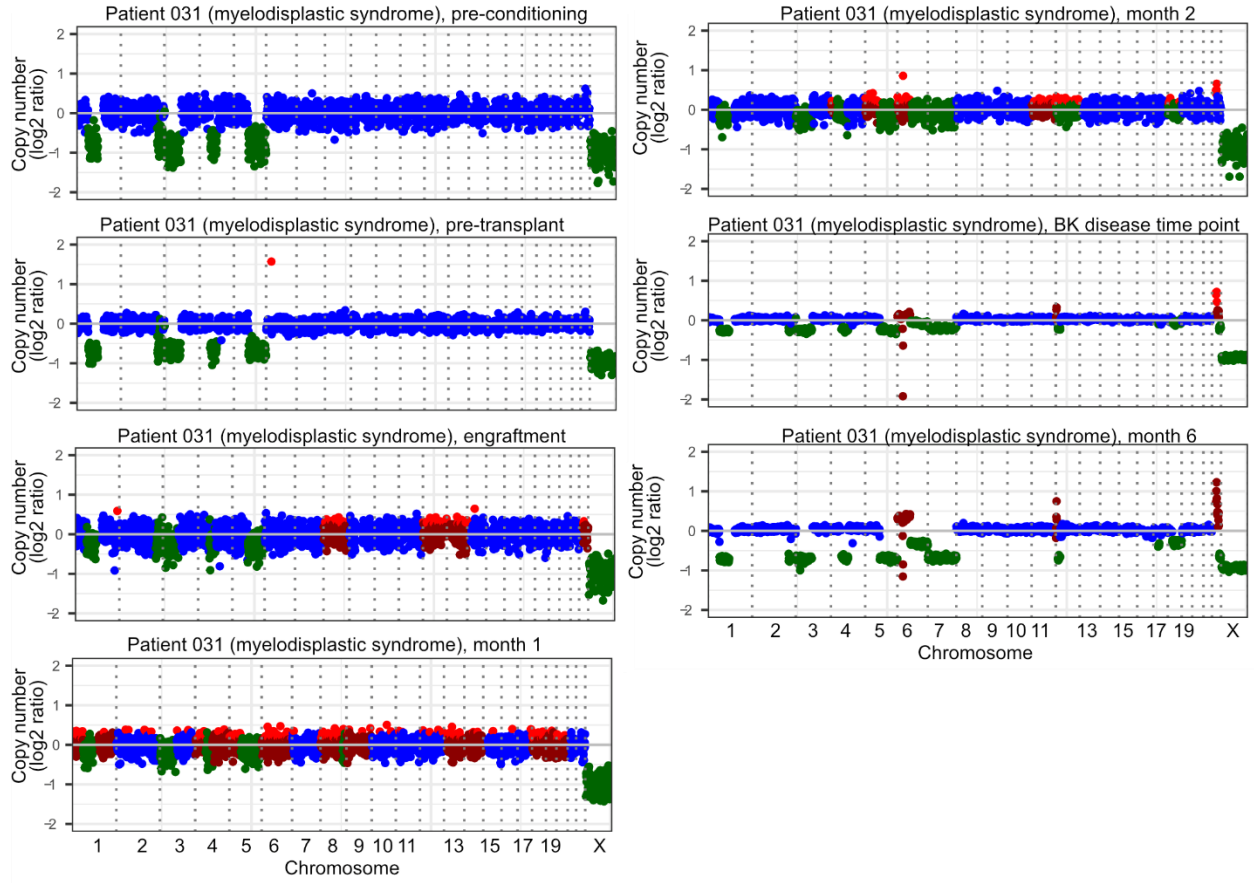

**Supplementary figure 6. Copy number profiles for patient 031.**

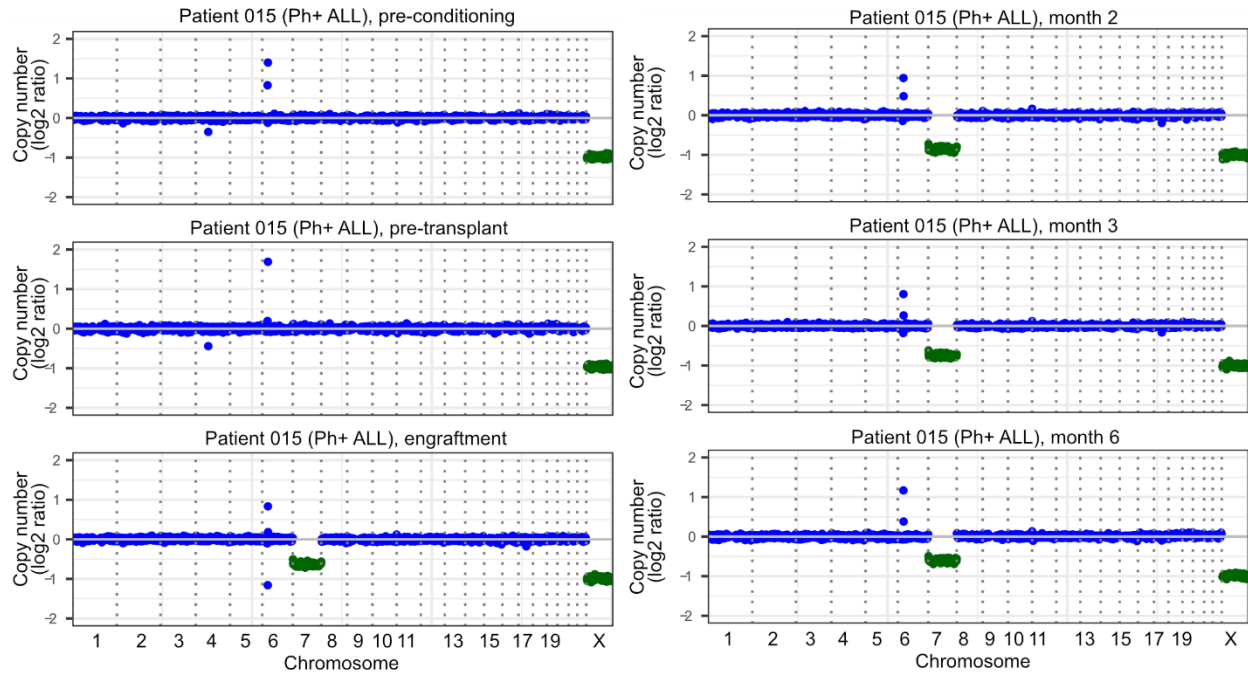

**Supplementary figure 7. Copy number profiles for patient 015.**



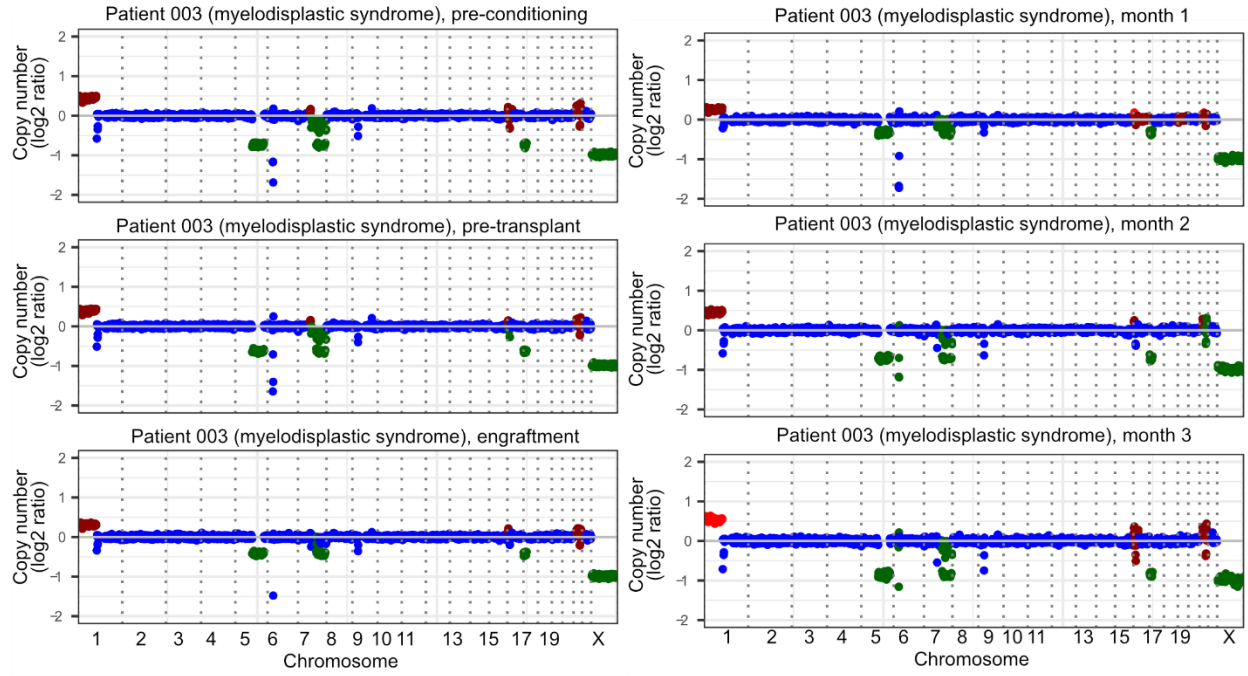

**Supplementary figure 8. Copy number profiles for patient 003.**

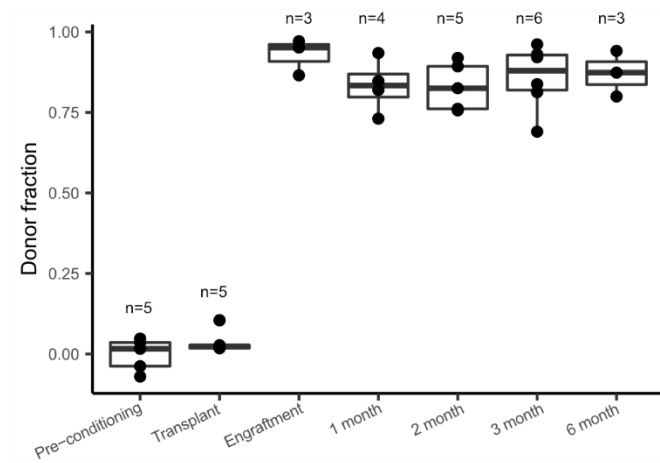

**Supplementary figure 9. Donor fraction in sex-mismatched patients who did not suffer from GVHD, relapse, or loss of graft during the first 6 months of their transplant.**

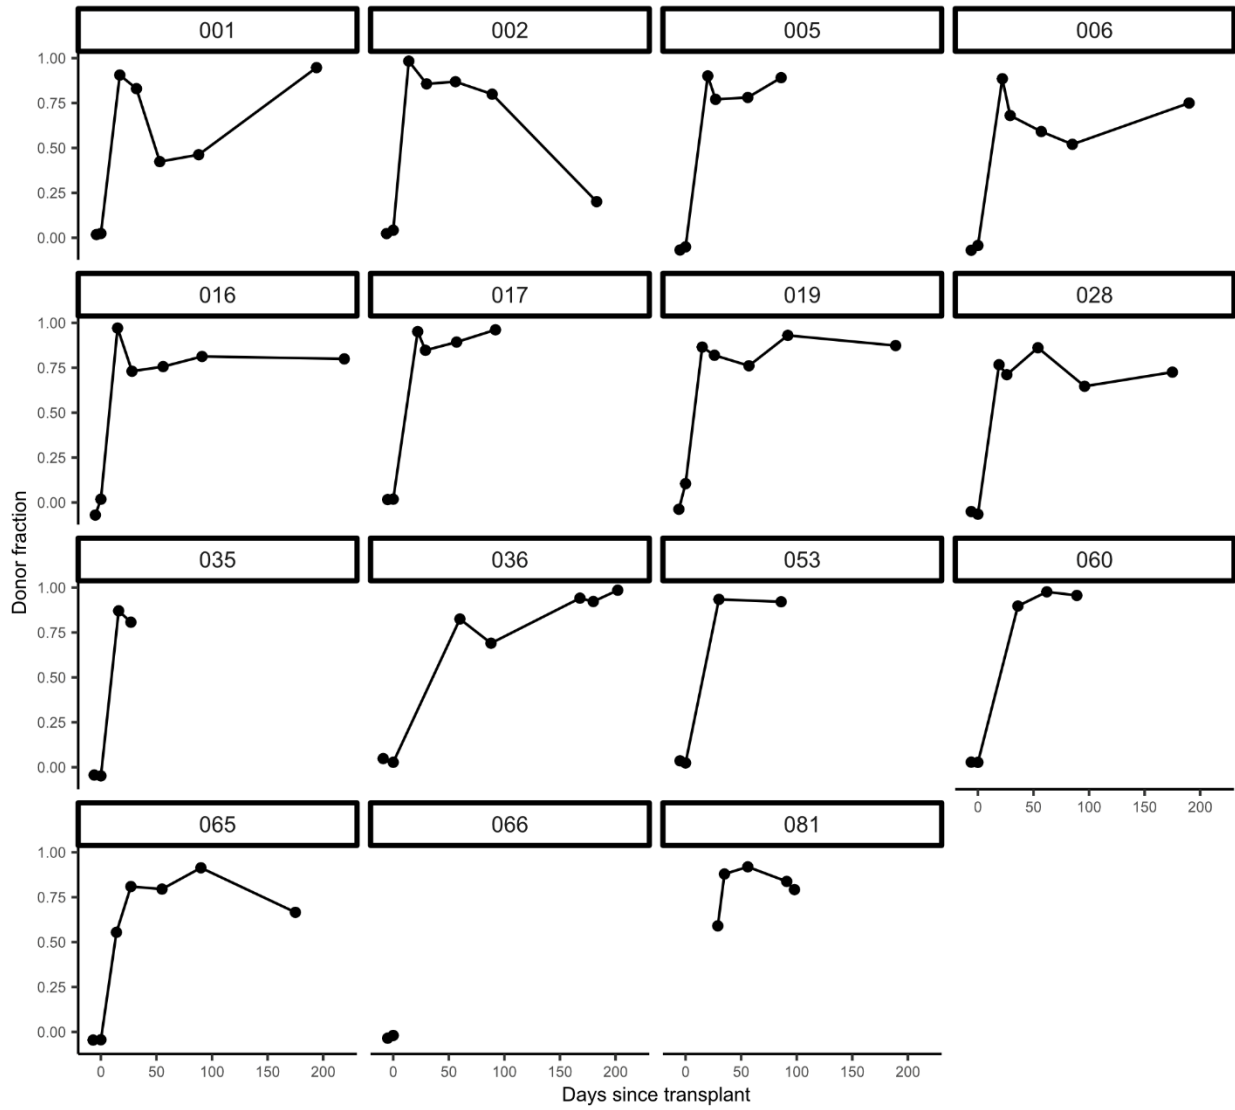

**Supplementary figure 10. Donor fractions in sex-mismatched hematopoietic cell transplant patients by day since transplant. Plot titles refer to patient IDs.**

**Supplementary table 1. Clinical information**

|                                                                       |            |                                          |              |
|-----------------------------------------------------------------------|------------|------------------------------------------|--------------|
| <b>Age at enrollment -- median (range) (years)</b>                    | 60 (20-73) | <b>Relation to donor -- no (%)</b>       |              |
| <b>Female sex -- no (%)</b>                                           | 11 (41%)   | Unrelated                                | 21 (78%)     |
| <b>Race / Ethnicity -- no (%)</b>                                     |            | Related                                  | 6 (22%)      |
| Caucasian                                                             | 25 (93%)   | <b>Recipient CMV status -- no (%)</b>    |              |
| American Indian/Alaskan Native                                        | 1 (4%)     | <b>R+</b>                                | 14 (52%)     |
| Asian                                                                 | 1 (4%)     | <b>R-</b>                                | 13 (48%)     |
| <b>Reason for hematopoietic cell transplant -- no (%)<sup>1</sup></b> |            | <b>GVHD status -- no (%)<sup>2</sup></b> |              |
| Acute myeloid leukemia                                                | 7 (26%)    | Overall grade I                          | 6 (22%)      |
| Myelodysplastic syndrome                                              | 5 (19%)    | Overall grade II                         | 4 (15%)      |
| Acute lymphocytic leukemia                                            | 5 (19%)    | Overall grade III                        | 2 (7%)       |
| T-Cell lymphoma                                                       | 3 (11%)    | Overall grade IV                         | 5 (19%)      |
| Mantle cell lymphoma                                                  | 2 (7%)     | Skin staging I                           | 3 (11%)      |
| Aplastic anemia                                                       | 2 (7%)     | Skin staging II                          | 3 (11%)      |
| Chronic myelomonocytic leukemia                                       | 1 (4%)     | Skin staging III                         | 2 (7%)       |
| Chronic lymphocytic leukemia                                          | 1 (4%)     | Skin staging IV                          | 3 (11%)      |
| Myelofibrosis                                                         | 1 (4%)     | Liver staging I                          | 3 (11%)      |
| Paroxysmal nocturnal hemoglobinuria                                   | 1 (4%)     | Liver staging II                         | 0 (0%)       |
| Cutaneous lymphoma                                                    | 1 (4%)     | Liver staging III                        | 1 (4%)       |
| <b>Source of HCT -- no (%)</b>                                        |            | Liver staging IV                         | 0 (0%)       |
| Peripheral blood                                                      | 19 (70%)   | Gut staging I                            | 1 (4%)       |
| Bone marrow                                                           | 5 (19%)    | Gut staging II                           | 1 (4%)       |
| Umbilical cord                                                        | 3 (11%)    | Gut staging III                          | 1 (4%)       |
| <b>HLA matching -- no (%)</b>                                         |            | Gut staging IV                           | 2 (7%)       |
| Match                                                                 | 17 (63%)   | <b>Conditioning regimen -- no (%)</b>    |              |
| Mismatch                                                              | 6 (22%)    | Reduced intensity                        | 25 (93%)     |
| Haploidentical                                                        | 4 (15%)    | Myeloablative                            | 2 (7%)       |
| <b>Conditioning regimen -- no (%)</b>                                 |            | <b>Other characteristics -- no (%)</b>   |              |
| Busulfan, Fludarabine                                                 | 14 (52%)   | Mortality                                | 3 (11%)      |
| Cyclophosphamide, Fludarabine, total body irradiation (TBI)           | 4 (15%)    | Previous HCT                             | 0 (0%)       |
| Fludarabine, Melphalan                                                | 2 (7%)     | Time to GVHD onset (median ± std)        | 71 ± 55 days |
| Cyclophosphamide, Fludarabine, TBI, anti-thymocyte globulin           | 2 (7%)     | T-cell depletion                         | 0 (0%)       |
| Busulfan, Fludarabine, Venetoclax                                     | 1 (4%)     | <b>GVHD treatment – no (%)</b>           |              |
| Busulfan, Fludarabine, Thiotepa                                       | 1 (4%)     | Glucocorticoids                          | 9 (33%)      |
| Fludarabine, anti-thymocyte globulin, Melphalan                       | 1 (4%)     | ruxolitinib, glucocorticoids             | 2 (7%)       |
| Cyclophosphamide, TBI                                                 | 1 (4%)     | Sirolimus, ruxolitinib, glucocorticoids  | 1 (4%)       |

|                                                                     |         |                                                    |        |
|---------------------------------------------------------------------|---------|----------------------------------------------------|--------|
| Cyclophosphamide, Fludarabine, TBI                                  | 1 (4%)  | Tacrolimus, glucocorticoids                        | 1 (4%) |
| <b>GVHD prophylaxis -- no (%)</b>                                   |         | Mycophenolate mofetil, tacrolimus, glucocorticoids | 1 (4%) |
| Methotrexate, Tacrolimus, Sirolimus                                 | 9 (33%) |                                                    |        |
| Methotrexate, Tacrolimus                                            | 9 (33%) |                                                    |        |
| Mycophenolate mofetil, Tacrolimus, Post-transplant cyclophosphamide | 6 (22%) |                                                    |        |
| Tacrolimus, Sirolimus                                               | 2 (7%)  |                                                    |        |
| Mycophenolate mofetil, Tacrolimus                                   | 1 (4%)  |                                                    |        |

1. Two individuals received an HCT for two blood disorders
2. Three individuals had two separate incidences of GVHD

**Supplementary table 2. Oligonucleotides comprising nucleic acid control.**

|        | Sequence (5'-3')                                                       |
|--------|------------------------------------------------------------------------|
| oligo1 | TTTAACGCATAAACATGCGTTTTGGGTAGTGTTTTTTGGAAACACAGATCCGTGCGCACACCTGGTGGAG |
| oligo2 | ATAAACATGCGTTTTGGGTAGTGTTTTTTGGAAACACAGATCCGTGCGCACACCT                |
| oligo3 | GCGTTTTGGGTAGTGTTTTTTGGAAACACAGATCCGTGCG                               |
| oligo4 | GGTAGTGTTTTTTGGAAACACAGAT                                              |
